# Supplementary material
Source: bioRxiv or medRxiv preprint supplement (https://www.medrxiv.org/highwire/filestream/86763/field_highwire_adjunct_files/0/2020.05.23.20110189-1.pdf)
Supplement: Supplementary file [file 2020.05.23.20110189-1.pdf]

## Supplementary Online Content

eTable 1. Data source table for COVID-19 deaths and determinant features of the states in the United States

**eTable 1. Data source table for COVID-19 deaths and determinant features of the states in the United States**

| <b>Feature Name</b>                    | <b>Source Name</b>                         | <b>Source webpage link</b>                          |
|----------------------------------------|--------------------------------------------|-----------------------------------------------------|
| Covid Deaths                           | The Covid Tracking Project                 | <a href="#">Covid Tracking Deaths</a>               |
| Covid Cases                            | The Covid Tracking Project                 | <a href="#">Covid Tracking Cases</a>                |
| Hospital Beds Per 1000 People          | The Kaiser Family Foundation               | <a href="#">KFF Hospital Beds</a>                   |
| Doctors Per 1000 People                | Association of American Medical Colleges   | <a href="#">AAMC Doctors Per 1000 People</a>        |
| Number of Nursing Homes                | Centers for Disease Control and Prevention | <a href="#">CDC Nursing Homes</a>                   |
| Total nursing home beds                | Centers for Disease Control and Prevention | <a href="#">CDC Nursing Home Beds</a>               |
| Average Household Income(Per 1 Person) | The United States Department of Justice    | <a href="#">Census Bureau Median Family Income</a>  |
| Population Density Per Square Mile     | United States Census Bureau                | <a href="#">US Census Bureau Population Density</a> |
| Total Population(2019)                 | The United States Census Bureau            | <a href="#">US Census Bureau Total Population</a>   |
| Racial Majority(2018)                  | The Kaiser Family Foundation               | <a href="#">KFF Racial Majority</a>                 |
| Percent of African Americans           | The Kaiser Family Foundation               | <a href="#">KFF African American Percentage</a>     |
| Percent of Male Population             | The Kaiser Family Foundation               | <a href="#">KFF Male Percent</a>                    |

| <b>Feature Name</b>                                          | <b>Source Name</b>                                 | <b>Source webpage link</b>                                           |
|--------------------------------------------------------------|----------------------------------------------------|----------------------------------------------------------------------|
| Median Age                                                   | The Kaiser Family Foundation                       | <a href="#">KFF Median Age</a>                                       |
| Date of School Closing                                       | IHME(Institute For Health Metrics and Evaluation)  | <a href="#">IHME School Closing</a>                                  |
| Date of Lockdown                                             | IHME(Institute For Health Metrics and Evaluation)  | <a href="#">IHME Lockdown Date</a>                                   |
| Flights To Europe                                            | Travel Math, OpenFlights                           | <a href="#">TravelMath Flights to Europe, Open Flights to Europe</a> |
| Flights To China                                             | Travel Math, Open Flights                          | <a href="#">TravelMath Flights to China, China Open Flights</a>      |
| Flights To Wuhan                                             | China Southern                                     | <a href="#">China Southern Wuhan Flights</a>                         |
| Average Temperatures the months of January Through March     | The National Centers for Environmental Information | <a href="#">NOAA Average Temperatures</a>                            |
| Average Humidity through the months of January Through March | Science of The Total Environment Volume 728        | <a href="#">Average Humidity</a>                                     |
